# Supplementary material for: Preparation of Hydrophobic Au Catalyst and Application in One-Step Oxidative Esterification of Methacrolein to Methyl Methacrylate
Source: MDPI journal article supplement (doi:10.3390/molecules29081854), 2024-04-19
Supplement: s1 [file s1]

## Supporting Information

# Preparation of Hydrophobic Au Catalyst and Application in One-Step Oxidative Esterification of Methacrolein to Methyl Methacrylate

Yanxia Zheng <sup>1,†</sup>, Yubo Yang <sup>1,†</sup>, Yixuan Li <sup>2</sup>, Lu Cai <sup>1</sup>, Xuanjiao Zhao <sup>1</sup>, Bing Xue <sup>2,\*</sup>, Yuchao Li <sup>1,\*</sup>, Jiutao An <sup>3</sup> and Jialiang Zhang <sup>4</sup>

<sup>1</sup> Institute of Clean Chemical Technology, School of Chemistry and Chemical Engineering, Shandong Collegial Engineering Research Center of Novel Rare Earth Catalysis Materials, Shandong University of Technology, Zibo 255049, China; yanxia2020@126.com (Y.Z.)

<sup>2</sup> School of Mechanical Engineering, Shandong University of Technology, Zibo 255049, China

<sup>3</sup> School of Resources and Environmental Engineering, Shandong University of Technology, Zibo 255049, China

<sup>4</sup> Shandong Mingsheng Environmental Protection Technology Co., Ltd., Jinan 250000, China

\* Correspondence: xuebing@sdut.edu.cn (B.X.); cyulee@126.com (Y.L.)

† These authors contributed equally to this work.

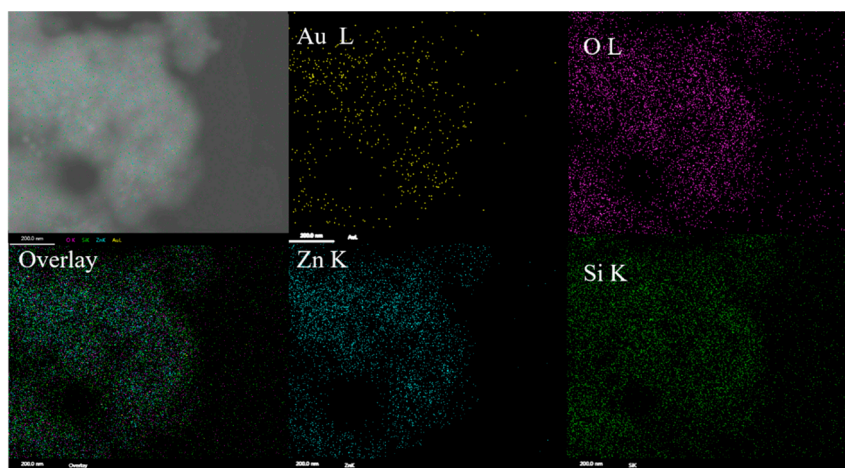

**Figure S1.** EDS diagram of Au/ZnO@Si catalyst.

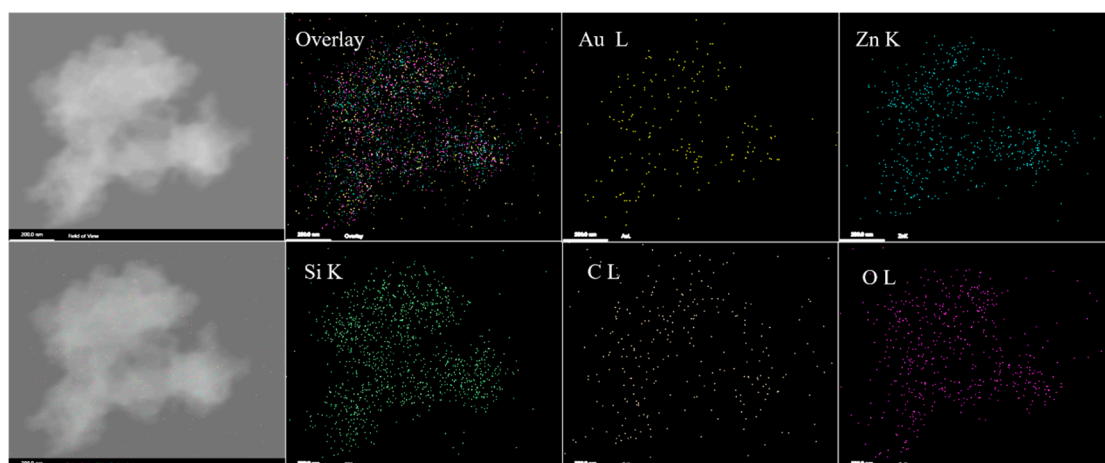

**Figure S2.** EDS diagram of Au/ZnO@Si-c(2.0) catalyst.

**Table S1.** XPS analysis of O1s for catalysts.

|            | O <sub>I</sub> |          | O <sub>II</sub> |          | O <sub>III</sub> |          |
|------------|----------------|----------|-----------------|----------|------------------|----------|
|            | BE             | Fraction | BE              | Fraction | BE               | Fraction |
|            | (eV)           | (%)      | (eV)            | (%)      | (eV)             | (%)      |
| Au/ZnO     | 530.12         | 44.72    | 531.32          | 39.69    | 532.31           | 15.59    |
| Au/ZnO@Si  | 532.15         | 60.28    | 533.0           | 25.18    | 533.86           | 14.53    |
| Au/ZnO@Si- | 532.33         | 54.34    | 533.2           | 39.09    | 533.42           | 6.57     |
| c(0.5)     |                |          |                 |          |                  |          |
| Au/ZnO@Si- | 532.86         | 66.14    | 533.34          | 27.71    | 534.31           | 6.15     |
| c(2.0)     |                |          |                 |          |                  |          |

**Table S2.** Catalyst performance

|                  | Con./% | Sel./% | TON  | Yield/% |
|------------------|--------|--------|------|---------|
| Au/ZnO           | 44.6   | 96     | 595  | 42.82   |
| Au/ZnO@Si        | 17.89  | 100    | 302  | 17.89   |
| Au/ZnO@Si-c(0.5) | 33.3   | 100    | 1394 | 33.3    |
| Au/ZnO@Si-c(2.0) | 63     | 12     | 310  | 7.12    |

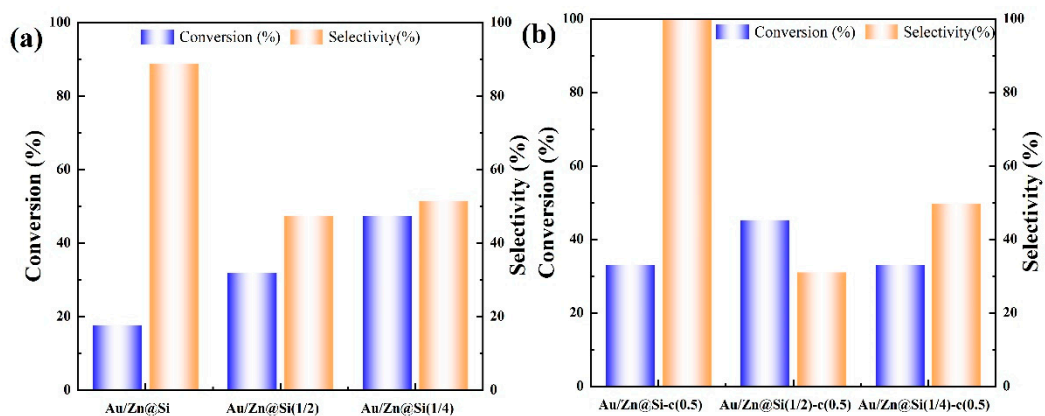

**Figure S3.** Catalytic performance of catalysts: (a): the catalytic performance of catalysts prepared with different amounts of TEOS for the reaction; (b): the catalytic performance of hydrophobic catalysts prepared with the same amount of hydrophobic reagent TMCS under different amounts of TEOS.
